# Supplementary material
Source: publisher site journal article supplement (https://www.dovepress.com/article/535977)
Supplement: Supplementary file 1 [file 535977%20Table%20S1.docx]

Table S1: Risk Factors for Falls Among Community-Dwelling Older Adults

| Category | Risk Factors |
| --- | --- |
| History of Falls | Includes the date, location, and time of falls; the patient's reported symptoms during the fall; use of assistive devices; and whether medical alert systems were in place. |
| Physiological Structure and Function | Nutritional status, mobility and endurance; limitations in activities of daily living (ADL); gait, strength, and balance; ankle flexibility; plantar tactile sensitivity; flexion/extension strength of toe joints; presence of moderate to severe hallux valgus or toe deformities. |
| Comorbidities | Includes but is not limited to: arrhythmia, orthostatic hypotension, aortic valve stenosis, congestive heart failure, coronary artery disease, peripheral arterial disease, thromboembolic disorders, neurological diseases (e.g., cerebellar dysfunction, delirium, cognitive impairment, dementia, Parkinson’s disease, stroke, and vision disorders), as well as diabetes, hepatic encephalopathy, osteoporosis, sarcopenia, and arthritis. |
| Medication-Related Factors | Use of medications that may increase the risk of falls, particularly: ACE inhibitors, alpha-blockers, anticoagulants, anticonvulsants, antipsychotics, high-dose caffeine, and chemotherapy agents. |
| Personal Factors | Advanced age, living alone, and level of knowledge or awareness regarding fall prevention. |
| Environmental Factors | Presence of stairs without handrails or grab bars, poor lighting, slippery or uneven flooring, obstacles or clutter, and seasonal hazards. |
